# Supplementary material for: Chitosan conjugated cyclodextrin nanocomposite loaded with antibiotic-adjuvant combinations remediates multi-drug resistant Staphylococcus aureus infection in CD-1 mice model of bovine mastitis
Source: Royal Society of Chemistry journal article supplement (doi:10.1039/d5nr03837e), 2025-12-25
Supplement: d5nr03837e1.pdf [file d5nr03837e1.pdf]

**1 Chitosan conjugated cyclodextrin nanocomposite loaded with antibiotic-adjuvant**  
**2 combinations remediates multi-drug resistant *Staphylococcus aureus* infection in CD-1 mice**  
**3 model of bovine mastitis**

4 Satwik Majumder <sup>a,b</sup>, Guillaume Millette <sup>c</sup>, Trisha Sackey <sup>b</sup>, Francois Malouin <sup>c</sup>, Saji George <sup>b\*</sup>

5 [satwik.majumder@rutgers.edu](mailto:satwik.majumder@rutgers.edu)

6 [guillaume.millette@USherbrooke.ca](mailto:guillaume.millette@USherbrooke.ca)

7 [trisha.sackey@mail.mcgill.ca](mailto:trisha.sackey@mail.mcgill.ca)

8 [francois.malouin@USherbrooke.ca](mailto:francois.malouin@USherbrooke.ca)

9 [saji.george@mcgill.ca](mailto:saji.george@mcgill.ca)

10 <sup>a</sup> Environmental and Occupational Health Sciences Institute (EOHSI) and School of Public Health,  
11 Rutgers University, Piscataway, NJ 08854, USA

12 <sup>b</sup> Department of Food Science and Agricultural Chemistry, Macdonald Campus, McGill  
13 University, 21,111 Lakeshore Ste Anne de Bellevue, Quebec H9X 3V9, Canada

14 <sup>c</sup> Département de biologie, Faculté des sciences, Université de Sherbrooke, Sherbrooke, Quebec  
15 J1K 2R1, Canada

16 \*Corresponding author

17 Address of correspondence

18 Department of Food Science and Agricultural Chemistry, Macdonald-Stewart Building, Room-  
19 1039, Macdonald Campus, McGill University 21111 Lakeshore, Ste Anne de Bellevue, Québec,  
20 H9X 3V9, Canada. Tel: (+1) 514-398-7920, Email: [saji.george@mcgill.ca](mailto:saji.george@mcgill.ca)

## Supplementary information

### **Supplementary information 1: Assessment of CF, CPZ, and TA for antibacterial synergism**

A three-dimensional checkerboard assay, as previously described by Stein *et al.*, was conducted to assess the antibacterial efficiency of the combination (CF, TA, and CPZ) <sup>1</sup>. CF, CPZ, and TA concentrations were selected based on the pre-determined MICs against Sa1158c. Tenfold, six-fold, and seven-fold serial dilutions of CF, CPZ, and TA, respectively, were performed in a 96-well plate. Ten  $\mu\text{L}$  of Sa1158c culture maintained at 0.5 McFarland standard ( $1.5 \times 10^8$  cells/ mL) in MHB broth was added further. The plates were incubated at 37 °C for 18 h, and 30  $\mu\text{L}$  of resazurin solution (0.5% of 100X resazurin in PBS buffer (pH-7.4)) was added to each well, and the plates were incubated for 2 h under mild shaking. The fluorescent intensity (530/590 nm) was measured using a plate reader (SpectraMax-i3X, Molecular Devices, USA).

The fractional inhibitory concentration index (FICI) was determined using the following formula:

$$\text{FICI}_{\text{CF/TA/CPZ}} = (\text{MIC}_{\text{CF(combination)}}/\text{MIC}_{\text{CF(alone)}}) + (\text{MIC}_{\text{CPZ(combination)}}/\text{MIC}_{\text{CPZ(alone)}}) + (\text{MIC}_{\text{TA(combination)}}/\text{MIC}_{\text{TA(alone)}})$$

FICI < 0.8, 0.8 < FICI < 4, and FICI  $\geq$  4 were considered synergism, additive or indifference, and antagonism effects, respectively.

### **Supplementary information 2: Physicochemical characterization of the particles**

An attenuated total reflectance-Fourier transform infrared (ATR-FT-IR) (ALPHA-P, Bruker, Billerica, MA, USA) was used to assess the surface functional groups of the particles <sup>2</sup>. Five microliters of the particle suspension were dropped on the ATR probe and allowed to dry. A wavelength range of 400–4000  $\text{cm}^{-1}$ , with a resolution of 4  $\text{cm}^{-1}$ , and 32 scans were used to obtain the FT-IR spectrum. Qualitative analysis was performed using the OMNIC 8.2.0.387 software.

45 The FTIR spectra of CPZ-CD-TA and CH Np-CF are provided in **Figure 1a**. The absorbance  
46 at  $1151\text{ cm}^{-1}$  in CH Np-CF is characteristic of the asymmetric vibration of the b-(1-4) glycosidic  
47 bond of chitosan. The low-intensity peaks at  $2935$  and  $2887\text{ cm}^{-1}$  are attributed to stretching  
48 vibrations of methylene groups in the polymeric chain. The peaks at  $1072\text{ cm}^{-1}$  and  $1531\text{ cm}^{-1}$   
49 represent C-O-C- stretching vibrations and  $\text{-NH}_2$  bending vibration peaks, respectively. The peak  
50 at  $1030\text{ cm}^{-1}$  shows the characteristic of P=O stretching vibration from phosphate groups, while the  
51 peak at  $1628\text{ cm}^{-1}$  is attributed to the electrostatic cross-linking between the phosphate group of TPP  
52 and the ammonium group of chitosan, suggesting the formation of CH Np <sup>3,4</sup>. CF in CH Np-CF was  
53 evident from the additional signals in  $1763$ ,  $1635$ ,  $1384$ , and  $1287\text{ cm}^{-1}$  corresponding to C=O  
54 stretching,  $\text{-NH}_2$  bending, C-N stretching, and C-O stretching, respectively. CD Np in CPZ-CD-TA  
55 was evident from the characteristic bands of saccharides:  $2932\text{ cm}^{-1}$  (C-H stretching vibration),  
56  $1651\text{ cm}^{-1}$  (O-H bending vibration), and  $1154\text{ cm}^{-1}$  (C-O vibration) <sup>5</sup>. The signal at  $857\text{ cm}^{-1}$   
57 corresponded to the  $\alpha$ -type glycosidic bond, characteristic of CD Np formed by glucopyranose units  
58 through the  $\alpha$ -1,4-glycosidic bond <sup>5</sup>. The peak at  $2973\text{ cm}^{-1}$  corresponds to the anti-symmetric  
59 vibration of a methyl group, indicating the existence of the hydroxypropyl group in CD Np <sup>5</sup>. CPZ  
60 in CPZ-CD-TA was evident from the signals  $1606$  and  $1651\text{ cm}^{-1}$  (phenyl rings),  $1510\text{ cm}^{-1}$  (C-H  
61 deformation), and  $752\text{ cm}^{-1}$  (aromatic C-H bending) <sup>6</sup>. TA showed an adsorption band at  
62 approximately  $3000\text{--}3500\text{ cm}^{-1}$  belonging to the stretching vibration of O-H groups. The absorption  
63 band at  $1187\text{ cm}^{-1}$  belongs to the bending vibration of O-H groups. The skeleton vibration band of  
64 benzene rings appeared at  $1443\text{--}1704\text{ cm}^{-1}$  <sup>7</sup>.

65

66 A Scanning Electron Microscope (SEM) (FEG Quanta 450 Field Emission Scanning  
67 Electron Microscope, USA) was used to analyse the surface morphology of the particles <sup>8</sup>.

68 Suspensions of particles (50 µg/mL) were dropped onto aluminum mounts, dried at room  
69 temperature, and coated with platinum before acquiring SEM images. ImageJ software was used to  
70 measure the size of particles. The hydrodynamic size and surface charge of the particles (50 µg/mL)  
71 were measured by Dynamic Light Scattering (DLS) (NanoBrook Omni instrument, Brookhaven,  
72 USA) at 25 °C <sup>7</sup>. The particles were loaded into a pre-rinsed folded capillary cell. A 100 V was  
73 applied to measure the zeta potential.

74 CD Np had a typical nano-sized spherical morphology <sup>9</sup>, while CPZ-CD-TA showed  
75 aggregation of particles forming a chain-like arrangement (**Figures 1b-g**). The size of CPZ-CD-TA  
76 ranged between ~120-260 nm. DLS studies indicated the hydrodynamic size of CD Np and CPZ-  
77 CD-TA to be ~135 nm and a zeta potential of ~-11 mV and ~-9.50 mV, respectively (**Table 1**). The  
78 weaker zeta potential might have led to the aggregation of these nanoparticles due to the Van Der  
79 Waals attractive forces <sup>7</sup>. CH Np was uniformly distributed and had a typical spherical structure  
80 with a size range between ~114-159 nm. Similarly, CH Np-CF showed a spherical morphology and  
81 was of variable sizes (~92-229 nm).

82

### 83 **Supplementary information 3: *In vitro* antibacterial efficiency of particles**

84 The *in vitro* antibacterial efficiency of the particles was determined using the broth  
85 microdilution method <sup>10</sup>. Briefly, the particles (250 µg/mL) were subjected to ten-twofold serial  
86 dilution in 100 µL of MHB media in a sterile 96-well plate. Bacterial culture of 10 µL taken from  
87 cell suspension with OD adjusted to 0.5 McFarland standard ( $1.5 \times 10^8$  cells/mL) was added to the  
88 wells. The plate was incubated at 37 °C for 18 h. The colony-forming units (CFU) were enumerated  
89 using a drop plate culturing method, as detailed earlier <sup>10, 11</sup>. For this, 10 µL from the treated wells  
90 were subjected to seven-fold serial dilutions in 100 µL of PBS (1X, pH 7.4) in a new 96-well plate.

91 Subsequently, 10  $\mu$ L of the cell suspension (from  $10^1$ ,  $10^3$ ,  $10^5$ , and  $10^7$  dilutions) was dropped onto  
92 one end of the rectangular TSA plates and allowed to flow down vertically. These plates were further  
93 incubated at 37 °C for 18 h, and the CFU in respective lanes were counted manually.

94

#### 95 **Supplementary information 4: Efficiency of NeACT against internalized *S. aureus* in epithelial** 96 **cells**

97 The cytotoxicity of NeACT was tested in Caco-2 cells <sup>12</sup>. Briefly, the Caco-2 cells were  
98 cultured in a 96-well plate ( $2 \times 10^4$  cells/well) until confluent and exposed to increasing  
99 concentrations of the particles (3.90-250  $\mu$ g/mL) suspended in DMEM media. After 24 h of  
100 incubation, resazurin of 50  $\mu$ g/mL (prepared with DMEM) was added and incubated for 4 h. The  
101 fluorescence was measured at 530/590 nm using a plate reader. Cells without treatment and cells  
102 treated with silver nitrate ( $\text{AgNO}_3$ ) were considered as negative and positive controls, respectively.

103

104 The efficiency of NeACT to target internalized *S. aureus* in epithelial cells (Caco-2) was  
105 determined by a pre-established protocol with modifications <sup>8, 13</sup>. Confluent Caco-2 cells ( $2 \times 10^4$   
106 cells/well) were exposed to Sa1158c culture maintained at  $1.5 \times 10^8$  cells/mL in a 96-well plate and  
107 incubated for an hour. The cells were washed using PBS (4 °C) and subjected to gentamicin (10  
108  $\mu$ g/mL) for 30 min. The extracellular gentamicin was removed by washing, followed by incubation  
109 with DMEM for 4 h to establish the intracellular infection model. The particles at incremental  
110 concentrations (3.90-15.62  $\mu$ g/mL) were added, and the plates were incubated for 24 h in a cell  
111 culture humidified incubator at 37 °C, with 5%  $\text{CO}_2$ . Subsequently, the cells were washed using  
112 PBS and lysed using 0.5% (v/v) of Triton X-100. CFU of viable intracellular bacteria were  
113 enumerated using the drop culture method as detailed earlier in section 5.2.8. Sa25923 was used as  
114 a reference strain, and cells infected with bacteria without treatment were considered as controls.



## 116 References

- 117 1. C. Stein, O. Makarewicz, J. A. Bohnert, Y. Pfeifer, M. Kesselmeier, S. Hagel and M. W. Pletz,  
118 *PLOS One*, 2015, **10**, e0126479.
- 119 2. L. Shao, S. Majumder, Z. Liu, R. Dai, T. Raj, S. Sudhakar and S. George, *Journal of*  
120 *Nanoparticle Research*, 2024, **26**, 195.
- 121 3. C. Lustriane, F. M. Dwivany, V. Suendo and M. Reza, *J Plant Biotechnol*, 2018, **45**, 36-44.
- 122 4. G. Behl, J. Iqbal, N. J. O'Reilly, P. McLoughlin and L. Fitzhenry, *Pharmaceutical Research*,  
123 2016, **33**, 1638-1648.
- 124 5. C. Yuan, B. Liu and H. Liu, *Carbohydrate Polymers*, 2015, **118**, 36-40.
- 125 6. W. Hussain, P. Kushwaha, M. Rahman and J. Akhtar, *Indian Journal of Pharmaceutical*  
126 *Education and Research*, 2017, **51**, s539-s547.
- 127 7. S. Majumder, C. Viau, A. Brar, J. Xia and S. George, *Applied Clay Science*, 2022, **228**, 106569.
- 128 8. A. Brar, S. Majumder, M. Z. Navarro, M.-O. Benoit-Biancamano, J. Ronholm and S. George,  
129 *Nanomaterials*, 2022, **12**, 2179.
- 130 9. A. H. Bashal, S. M. Riyadh, W. Alharbi, K. H. Alharbi, T. A. Farghaly and K. D. Khalil, *Polymers*,  
131 2022, **14**, 386.
- 132 10. L. Shao, S. Majumder, Z. Liu, K. Xu, R. Dai and S. George, *Journal of Photochemistry and*  
133 *Photobiology B: Biology*, 2022, **231**, 112450.
- 134 11. S. George, I. Tay, W. H. Phue, H. Gardner and B. Sukumaran, *Journal of Biomedical*  
135 *Nanotechnology*, 2019, **15**, 2216-2228.
- 136 12. S. Majumder, S. Huang, J. Zhou, Y. Wang and S. George, *Food Packaging and Shelf Life*, 2023,  
137 **39**, 101142.
- 138 13. S. Majumder, T. Sackey, C. Viau, S. Park, J. Xia, J. Ronholm and S. George, *BMC Microbiology*,  
139 2023, **23**, 43.

140
